# Supplementary material for: Transcriptomes of Trypanosoma brucei rhodesiense from sleeping sickness patients, rodents and culture: Effects of strain, growth conditions and RNA preparation methods
Source: PubMed Central journal article supplement (PMC5842037; doi:10.1371/journal.pntd.0006280), 2018-02-23

### A. rRNA-depleted human and rat datasets

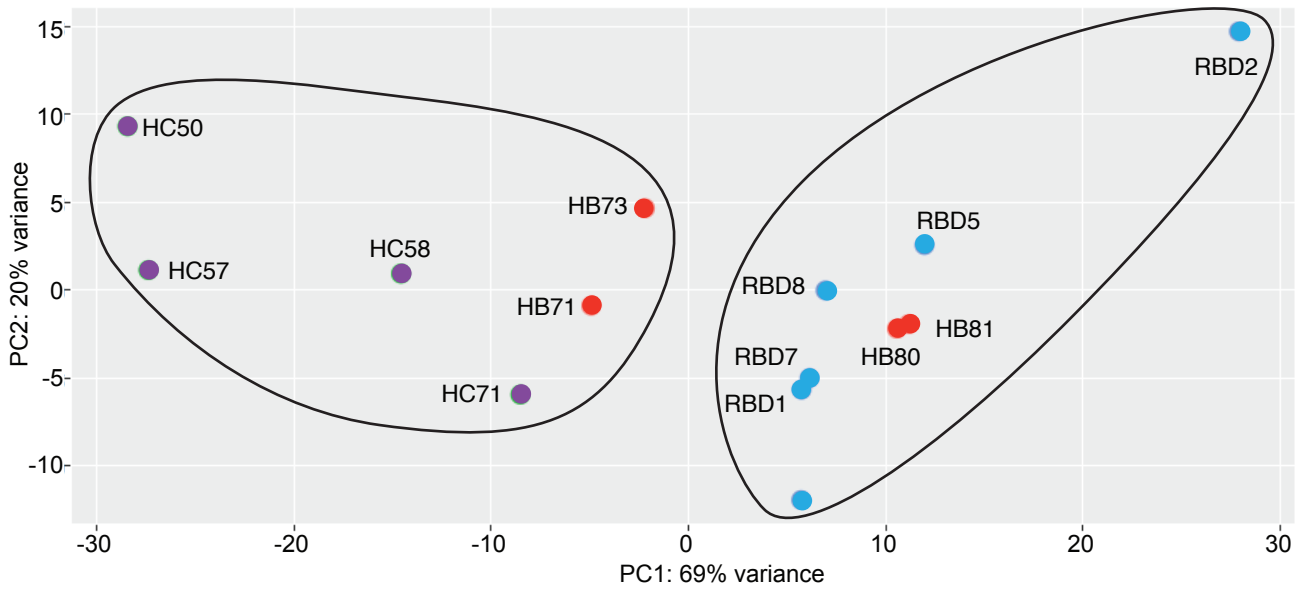

### B. Cluster analysis

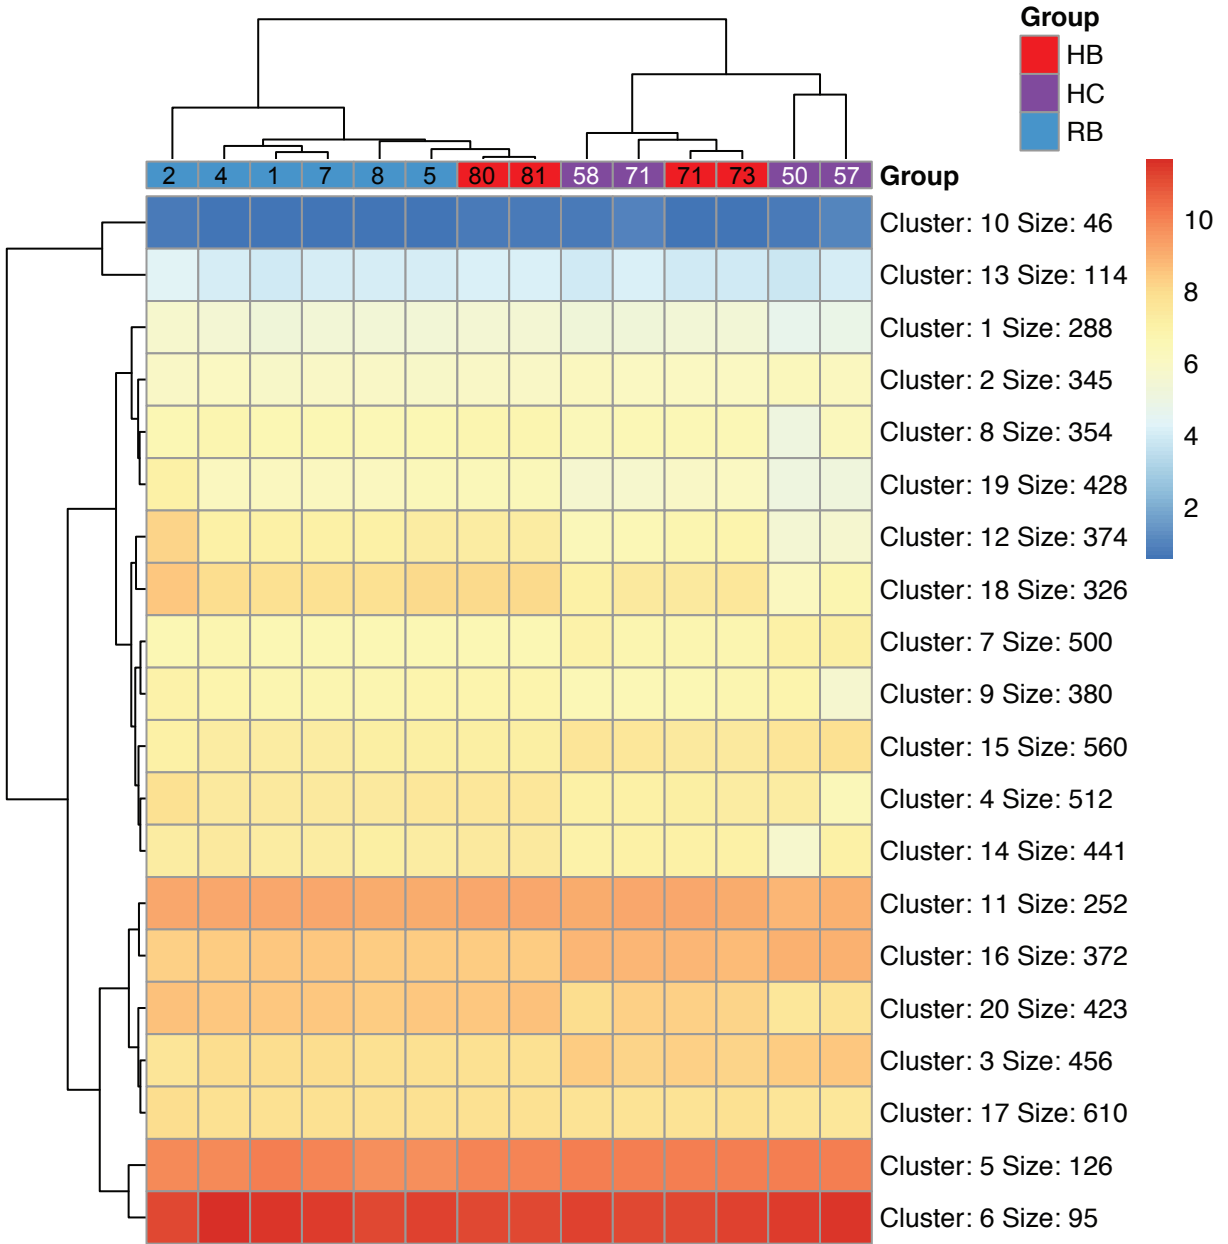

Supplement: pntd.0006280.s009.pdf [file pntd.0006280.s009.pdf]
