# Supplementary material for: Transcriptomes of Trypanosoma brucei rhodesiense from sleeping sickness patients, rodents and culture: Effects of strain, growth conditions and RNA preparation methods
Source: PubMed Central journal article supplement (PMC5842037; doi:10.1371/journal.pntd.0006280), 2018-02-23

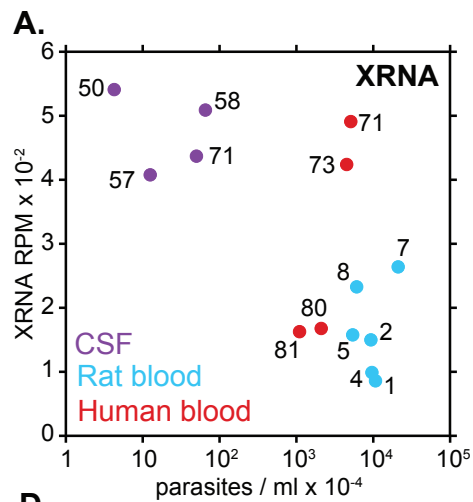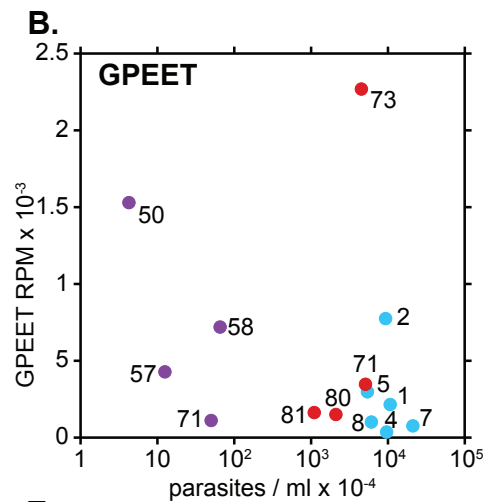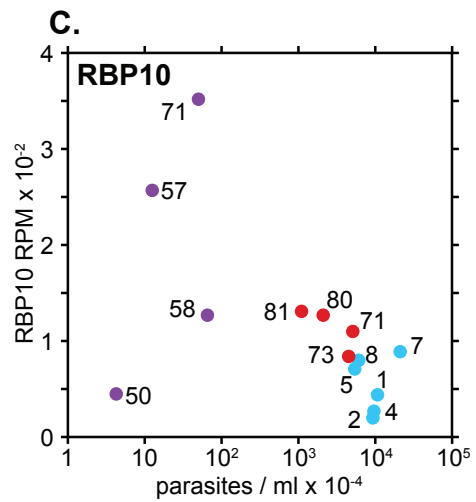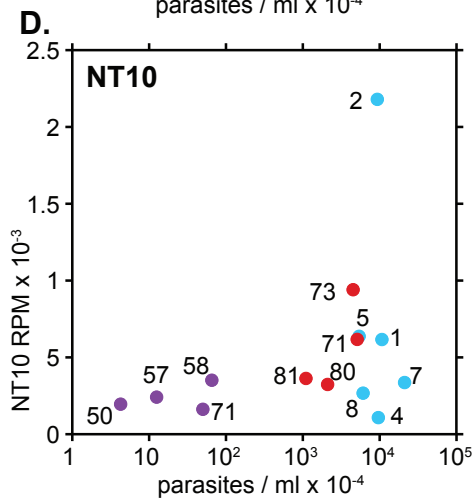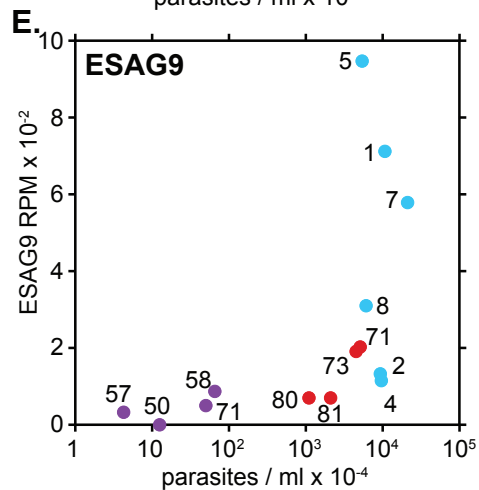

Supplement: pntd.0006280.s010.pdf [file pntd.0006280.s010.pdf]
